# Supplementary material for: Facile fabrication of Co2CuS4nanoparticle anchored N-doped graphene for high-performance asymmetric supercapacitors
Source: Royal Society of Chemistry journal article supplement (doi:10.1039/c6ta07400f), 2016-01-01
Supplement: c6ta07400f1.pdf [file c6ta07400f1.pdf]

Supporting Information for

**Facile fabrication of Co<sub>2</sub>CuS<sub>4</sub> nanoparticle anchored N-doped graphene for high-performance asymmetric supercapacitors**

Meng Guo<sup>a</sup>, Jayaraman Balamurugan<sup>a</sup>, Thanh Duy Tran<sup>a</sup>, Nam Hoon Kim<sup>a</sup>, Joong Hee Lee<sup>a, b\*</sup>

<sup>a</sup>Advanced Materials Institute of BIN Convergence Technology (BK21 Plus Global) & Dept. of BIN Convergence Technology, Chonbuk National University, Jeonju, Jeonbuk 54896, Republic of Korea

<sup>b</sup>Carbon Composite Research Centre, Department of Polymer - Nano Science and Technology, Chonbuk National University, Jeonju, Jeonbuk 54896, Republic of Korea

\*Corresponding author: E-Mail: [jlh@chonbuk.ac.kr](mailto:jlh@chonbuk.ac.kr) (Joong Hee Lee)

Fax: +82 832702341; Tel: +82 832702342

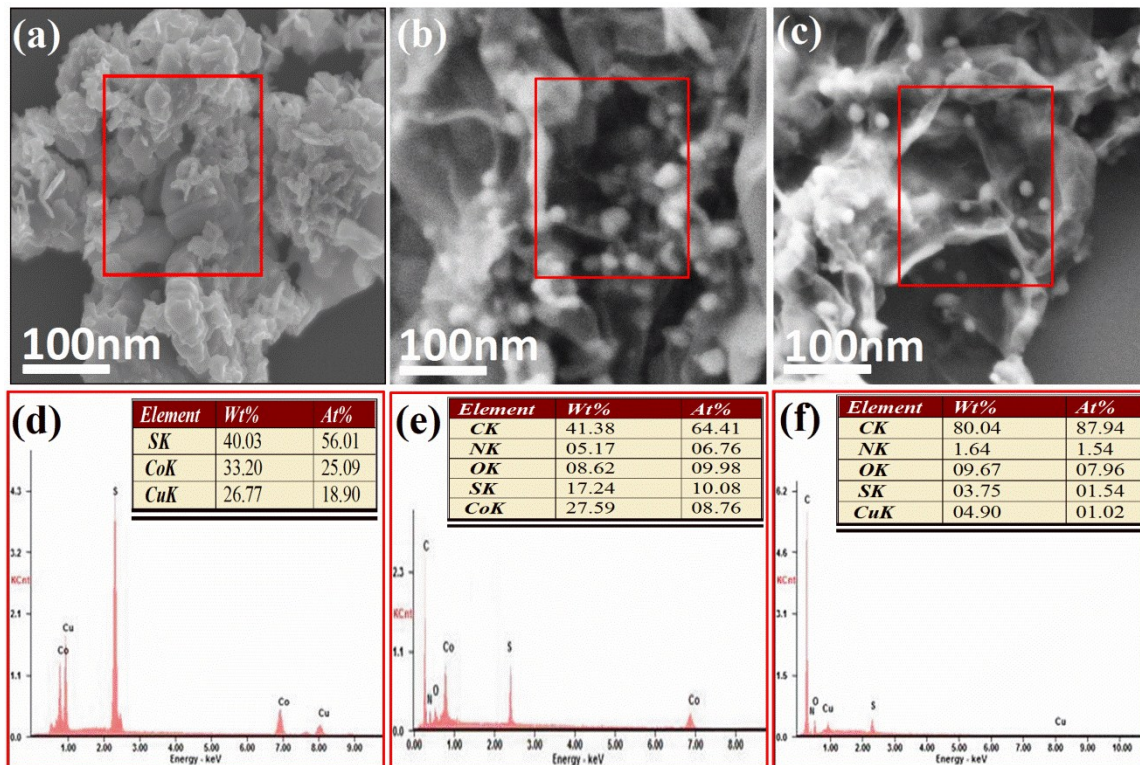

**Fig. S1** (a-c) FE-SEM images, and (d-f) EDAX spectrum of pure  $\text{Co}_2\text{CuS}_4$ ,  $\text{CoS/NG}$  and  $\text{Cu}_2\text{S/NG}$ , respectively.

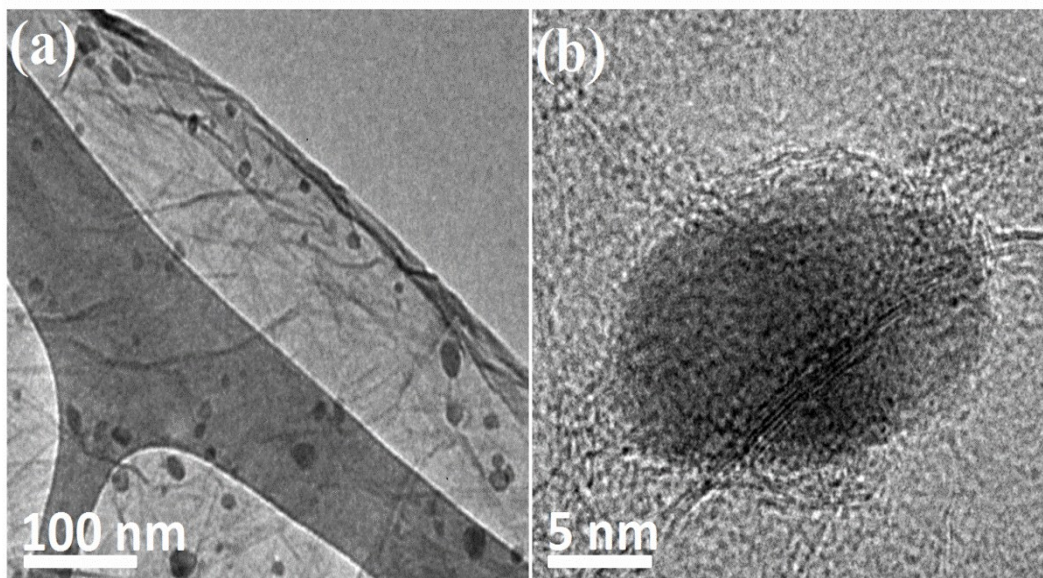

**Fig. S2.** TEM image with different magnification of Co<sub>2</sub>CuS<sub>4</sub>/NG composite (after 5 h strong ultrasonication and 12 h stirring in ethanol).

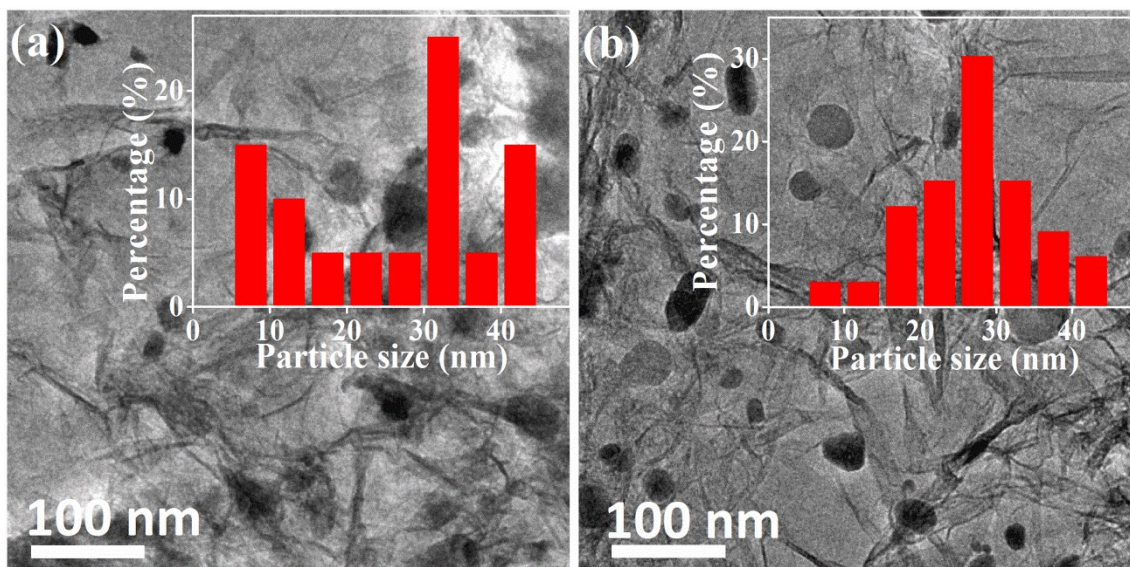

**Fig. S3** TEM images of (a) CoS/NG, and (b) Cu<sub>2</sub>S/NG composites.

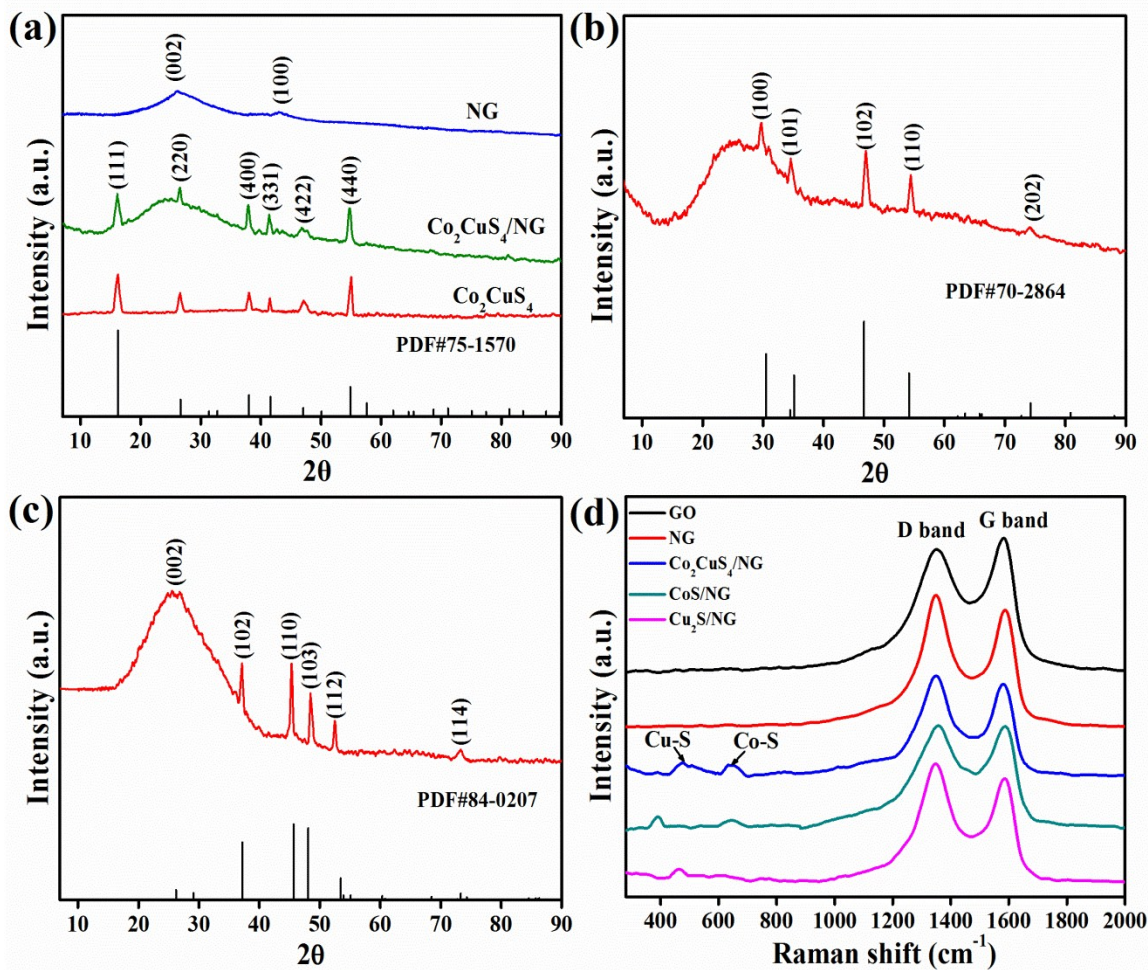

**Fig. S4** XRD pattern of (a) NG, pure  $\text{Co}_2\text{CuS}_4$  and  $\text{Co}_2\text{CuS}_4/\text{NG}$  composite, (b)  $\text{CoS}/\text{NG}$  and (c)  $\text{Cu}_2\text{S}/\text{NG}$ , (d) Raman spectra of GO, NG,  $\text{CoS}/\text{NG}$ ,  $\text{Cu}_2\text{S}/\text{NG}$  and  $\text{Co}_2\text{CuS}_4/\text{NG}$ .

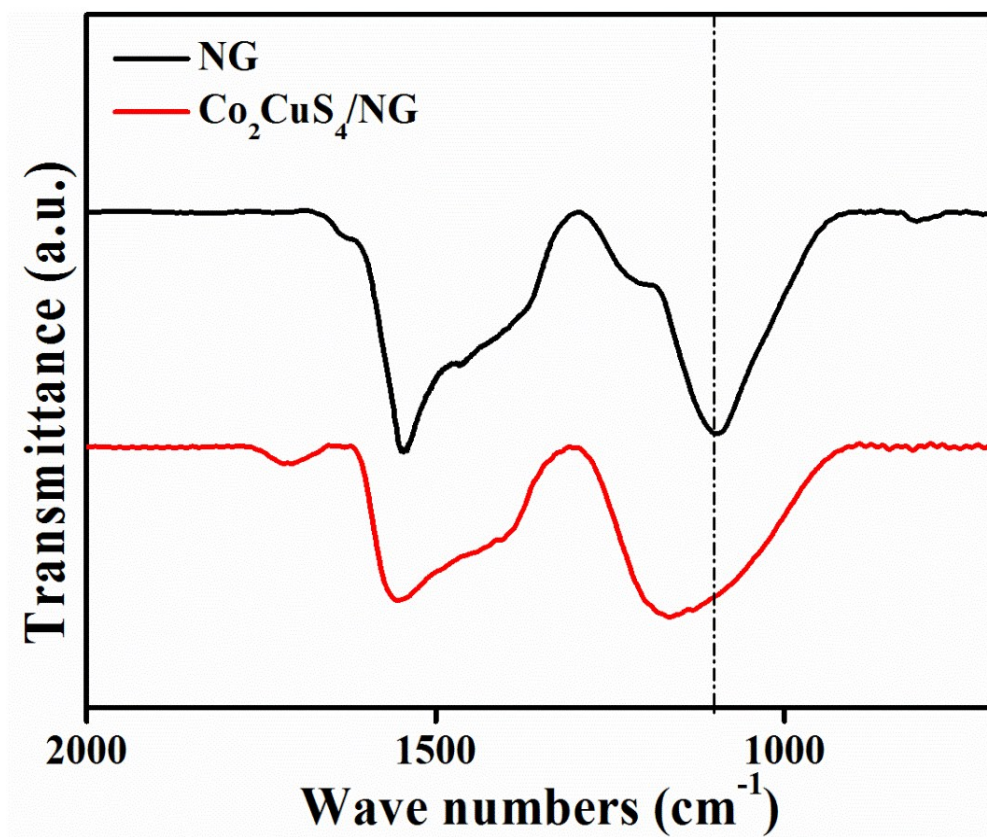

Fig. S5 FT-IR spectra of NG and Co<sub>2</sub>CuS<sub>4</sub>/NG composite.

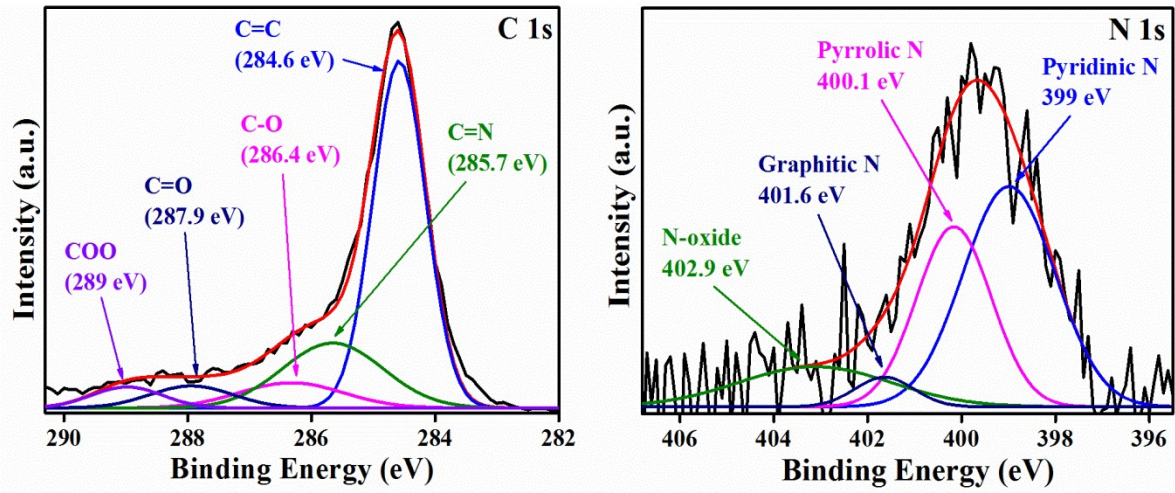

Fig. S6 High-resolution (a) C 1s spectrum, (b) N 1s spectrum of NG.

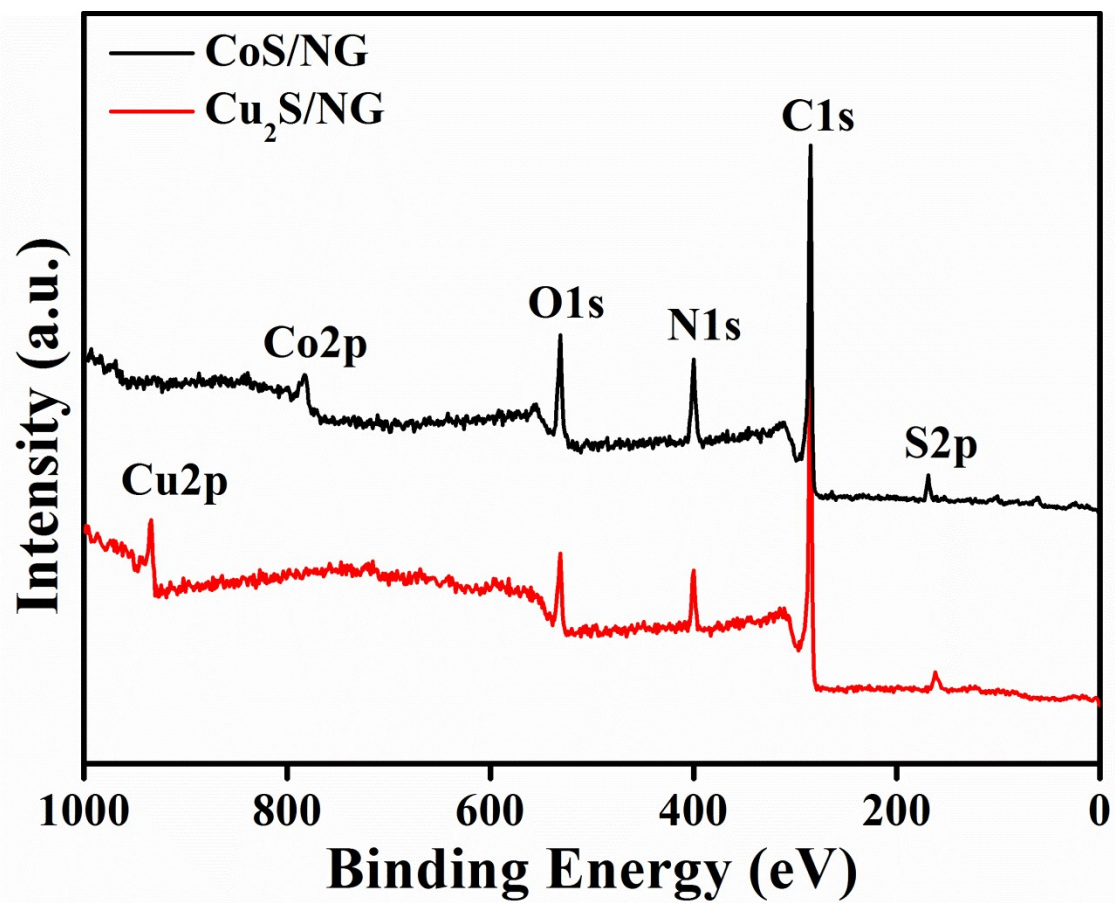

Fig. S7 XPS survey for CoS/NG and Cu<sub>2</sub>S/NG.



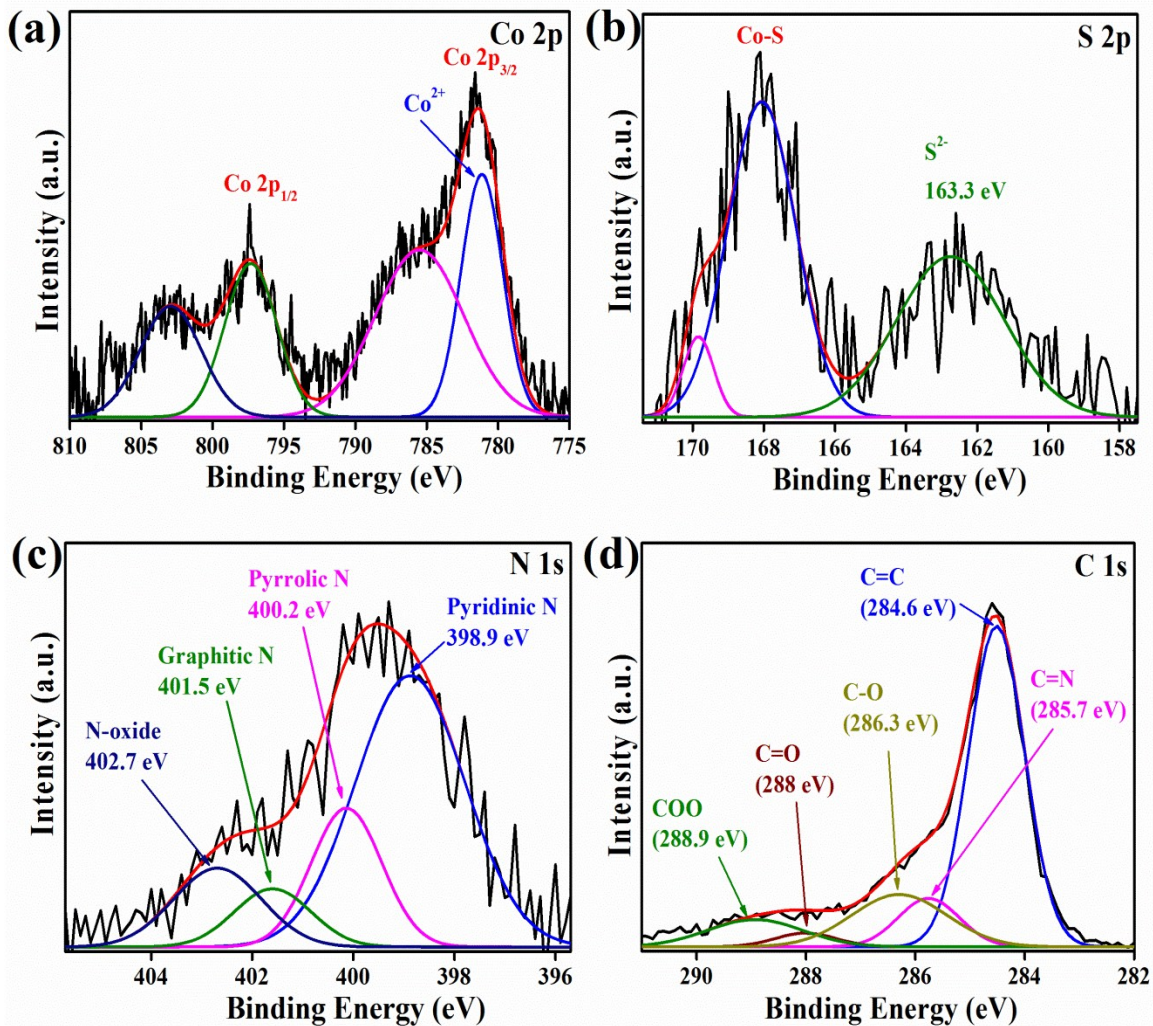

**Fig. S8** High-resolution (a) Co 2p spectrum, (b) S 2p spectrum, (c) N 1s spectrum and (d) C 1s spectrum of CoS/NG composite.

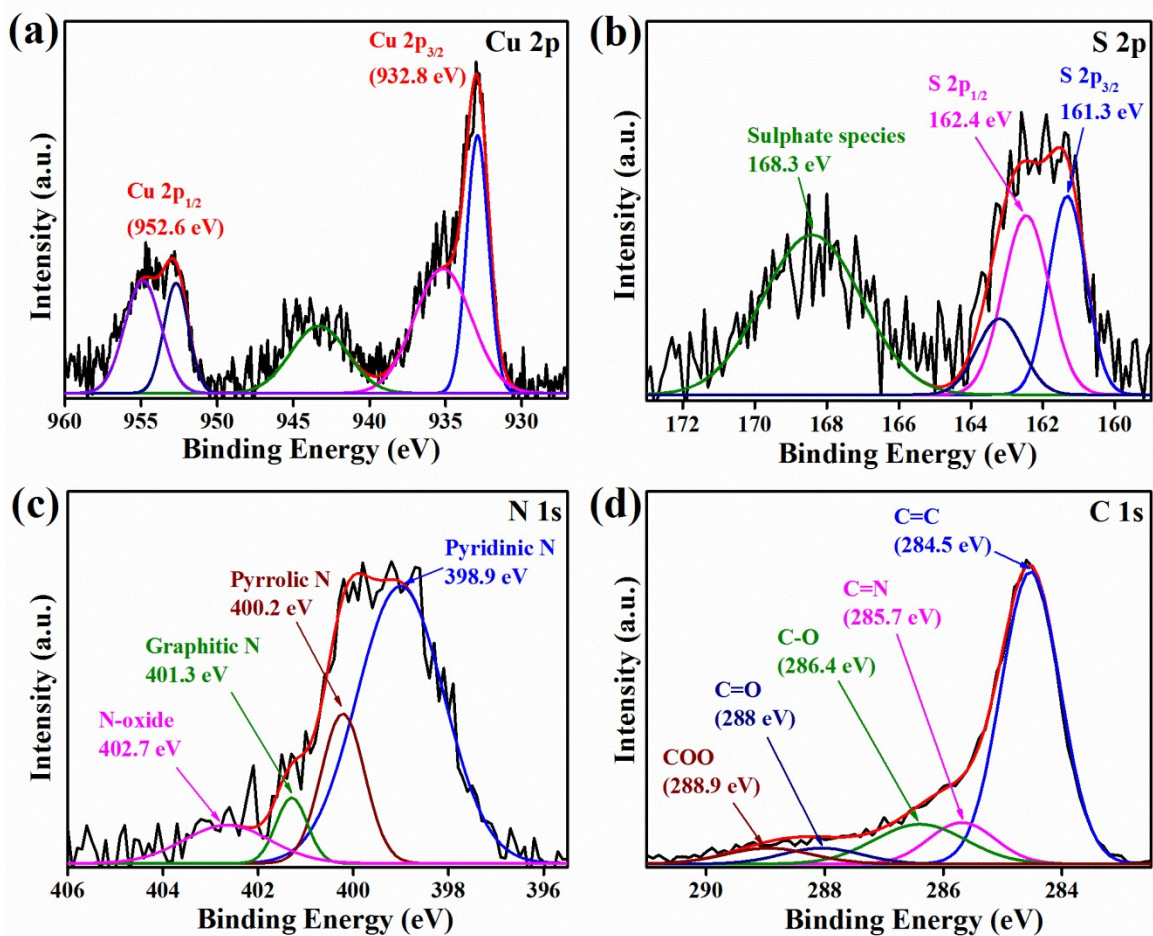

**Fig. S9** High-resolution (a) Cu 2p spectrum, (b) S 2p spectrum, (c) N 1s spectrum and (d) C 1s spectrum of Cu<sub>2</sub>S/NG composite.

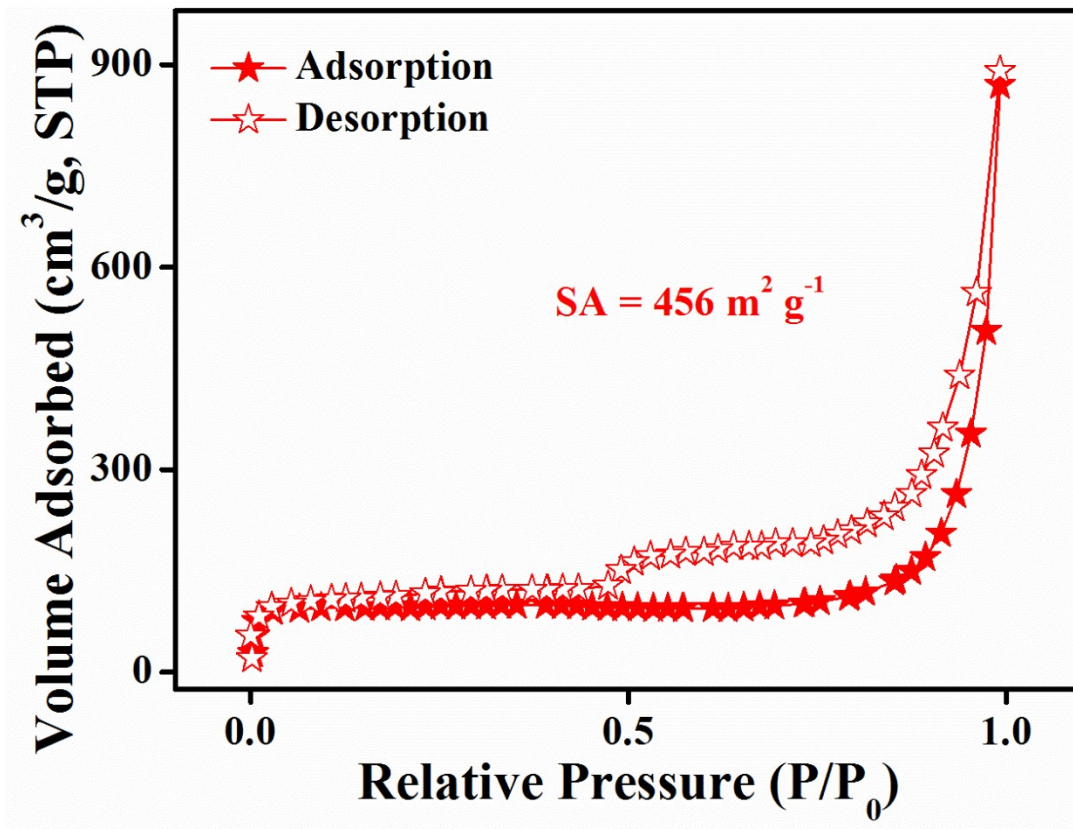

Fig. S10 N<sub>2</sub> adsorption–desorption isotherms of Co<sub>2</sub>CuS<sub>4</sub>/NG composite.

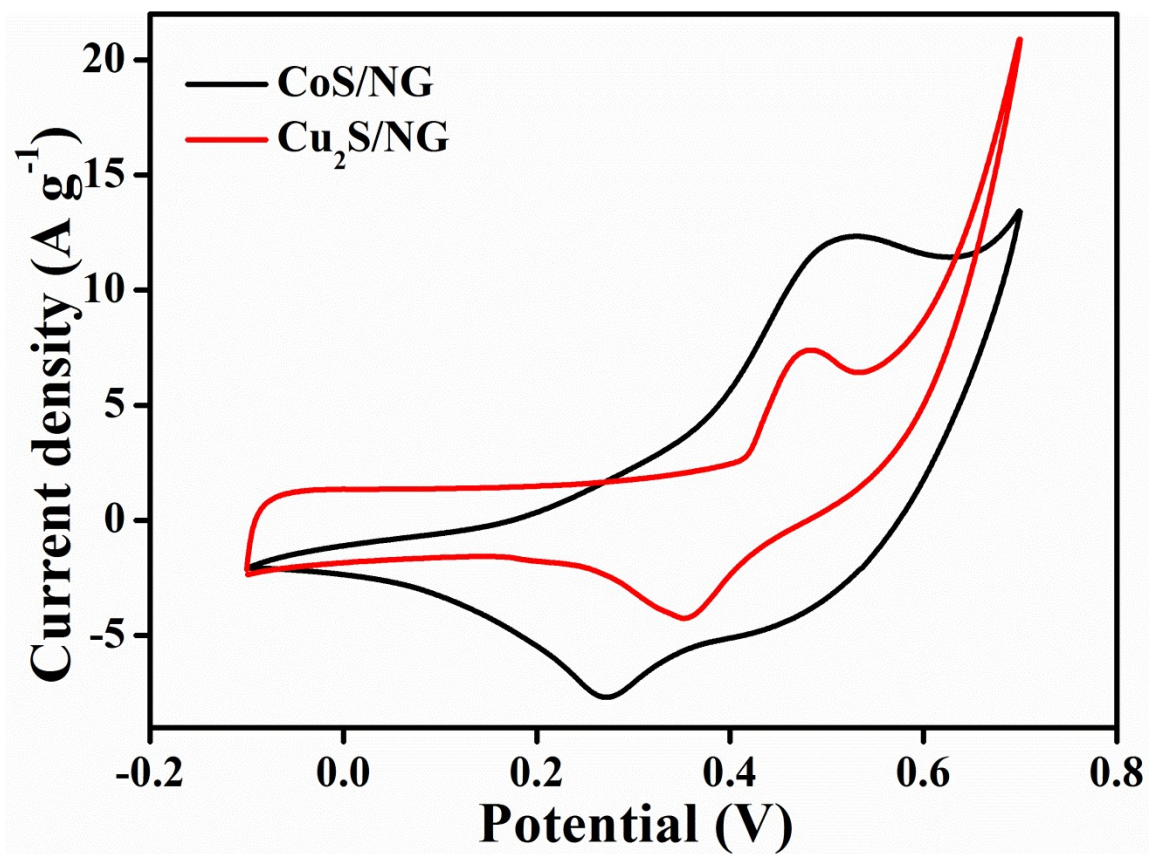

Fig. S11 CV curves of CoS/NG and Cu<sub>2</sub>S/NG composite at 10 mV s<sup>-1</sup>.

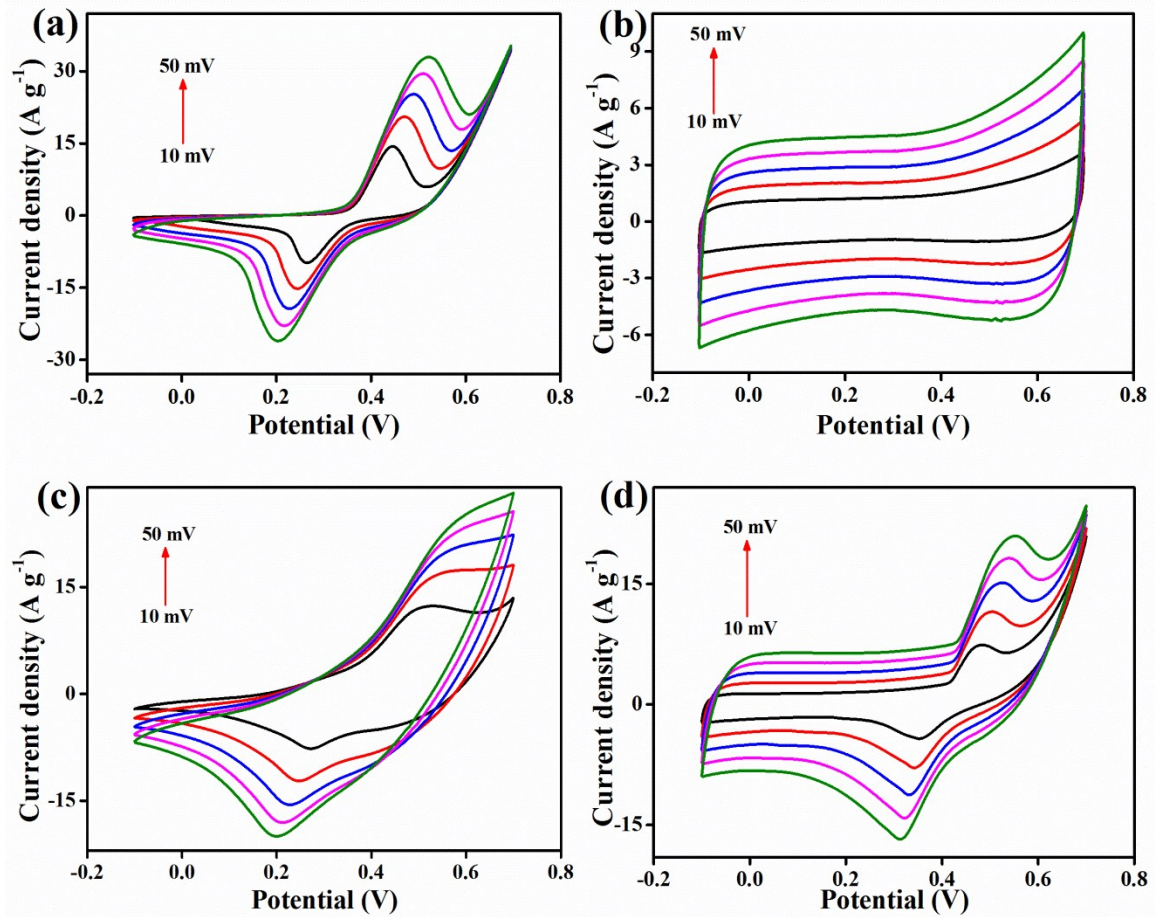

**Fig. S12** CV curves at different sweep rates (10-50  $mV\ s^{-1}$ ) of (a) pure  $Co_2CuS_4$ , (b) NG, (c)  $CoS/NG$  and (d)  $Cu_2S/NG$ .

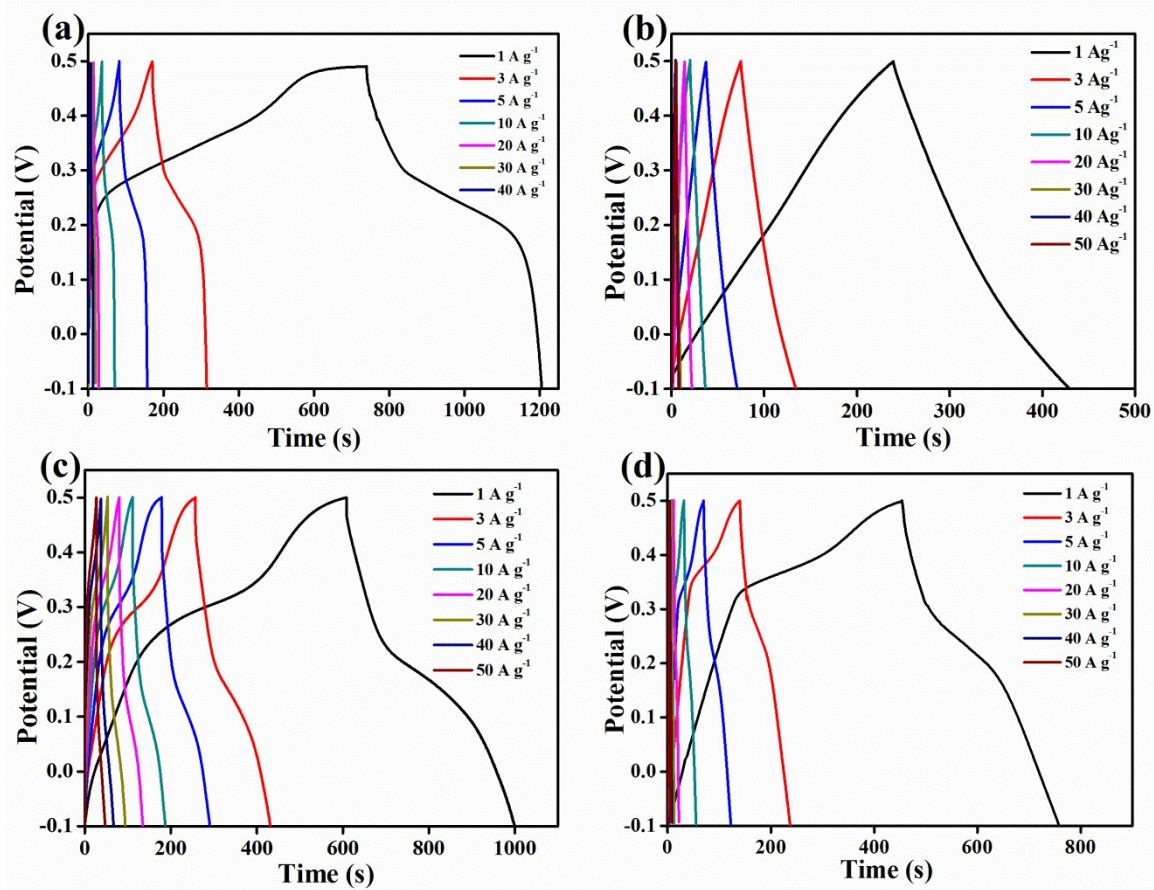

**Fig. S13** Galvanostatic charge–discharge curves at different current densities of (a) pure  $\text{Co}_2\text{CuS}_4$ , (b) NG, (c) CoS/NG and (d)  $\text{Cu}_2\text{S}/\text{NG}$ .

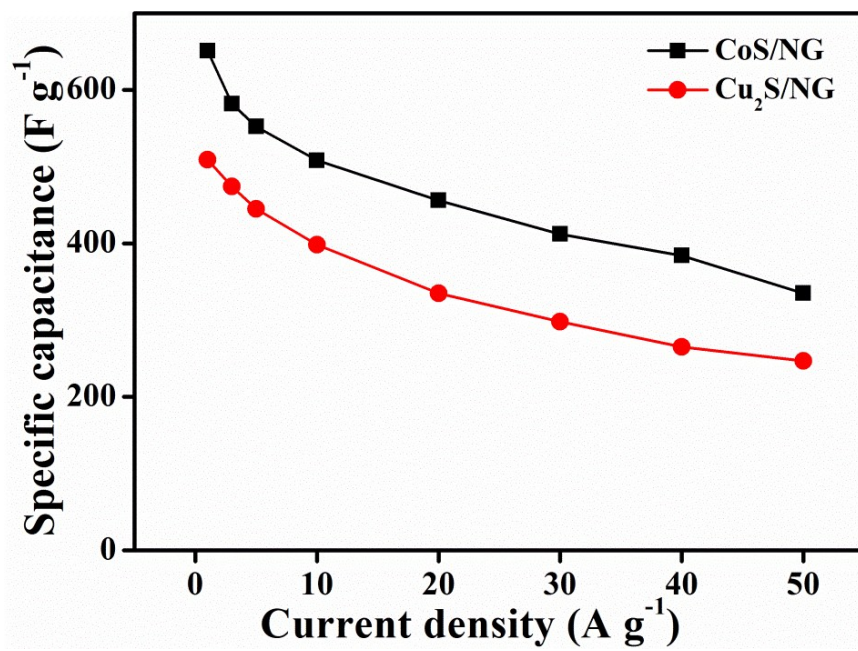

**Fig. S14** Specific capacitance vs. current density of CoS/NG and Cu<sub>2</sub>S/NG.

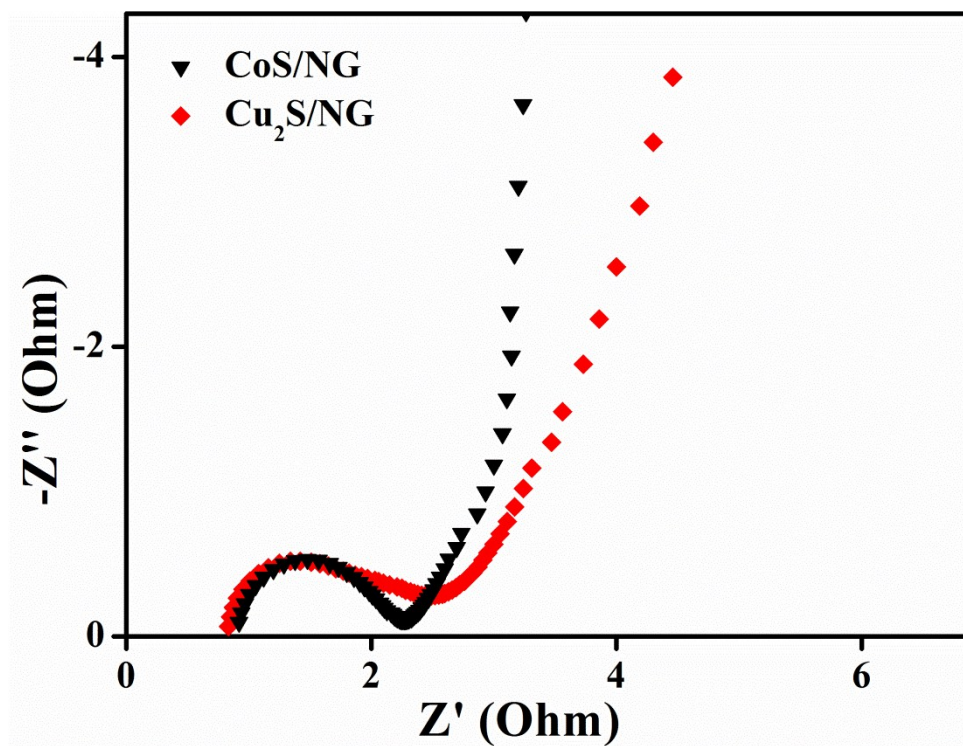

Fig. S15 Nyquist plots of CoS/NG and Cu<sub>2</sub>S/NG.



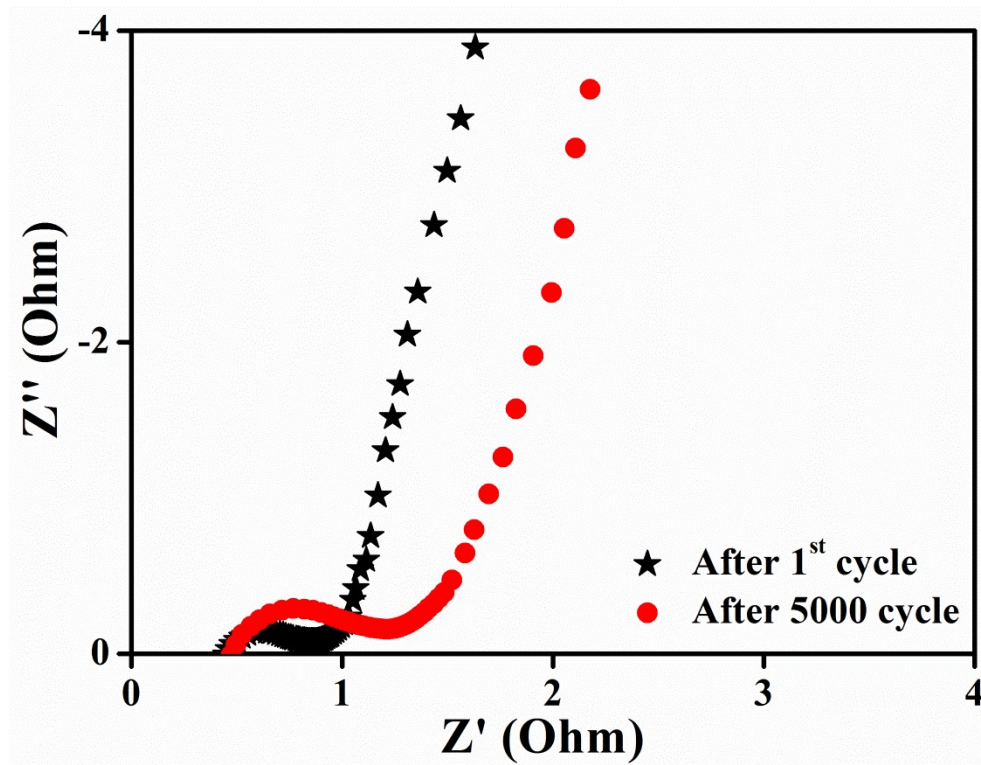

**Fig. S16** Nyquist plots of  $\text{Co}_2\text{CuS}_4/\text{NG}$  composite (measured during the cycle life test).

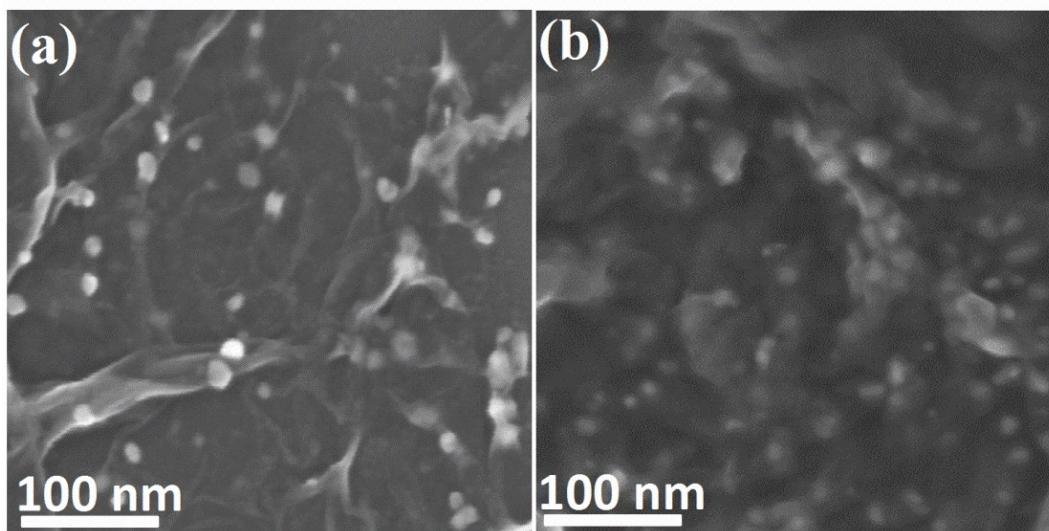

**Fig. S17** FE-SEM image of Co<sub>2</sub>CuS<sub>4</sub>/NG composite (a) before and (b) after 5000 cycles test.

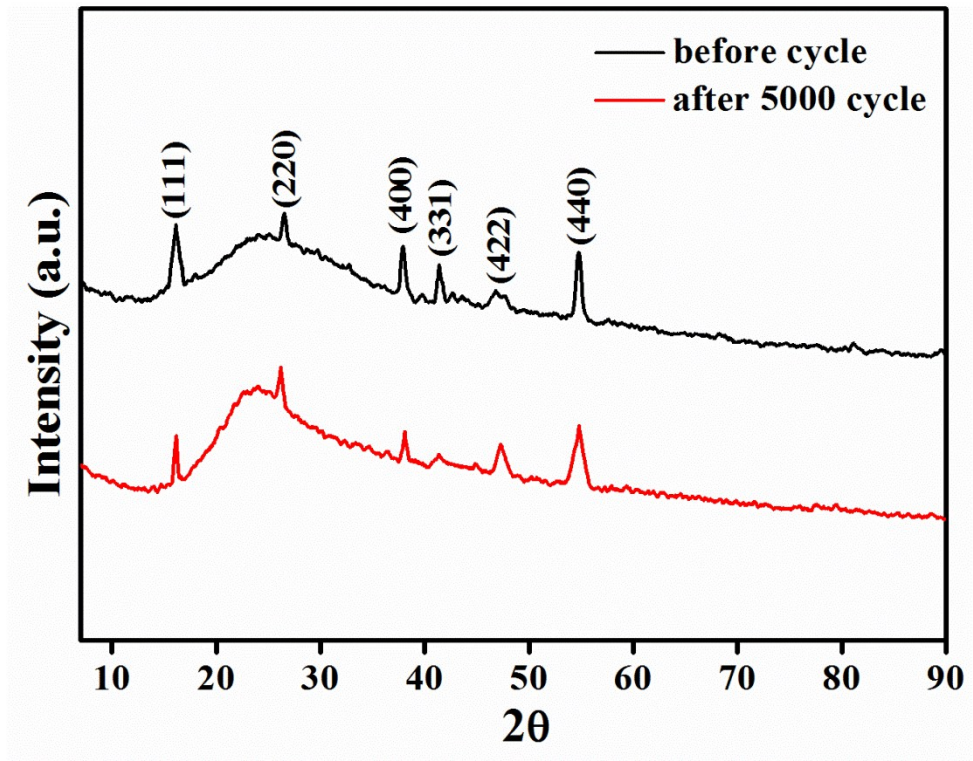

Fig. S18 XRD pattern of  $\text{Co}_2\text{CuS}_4/\text{NG}$  composite before and after stability test.

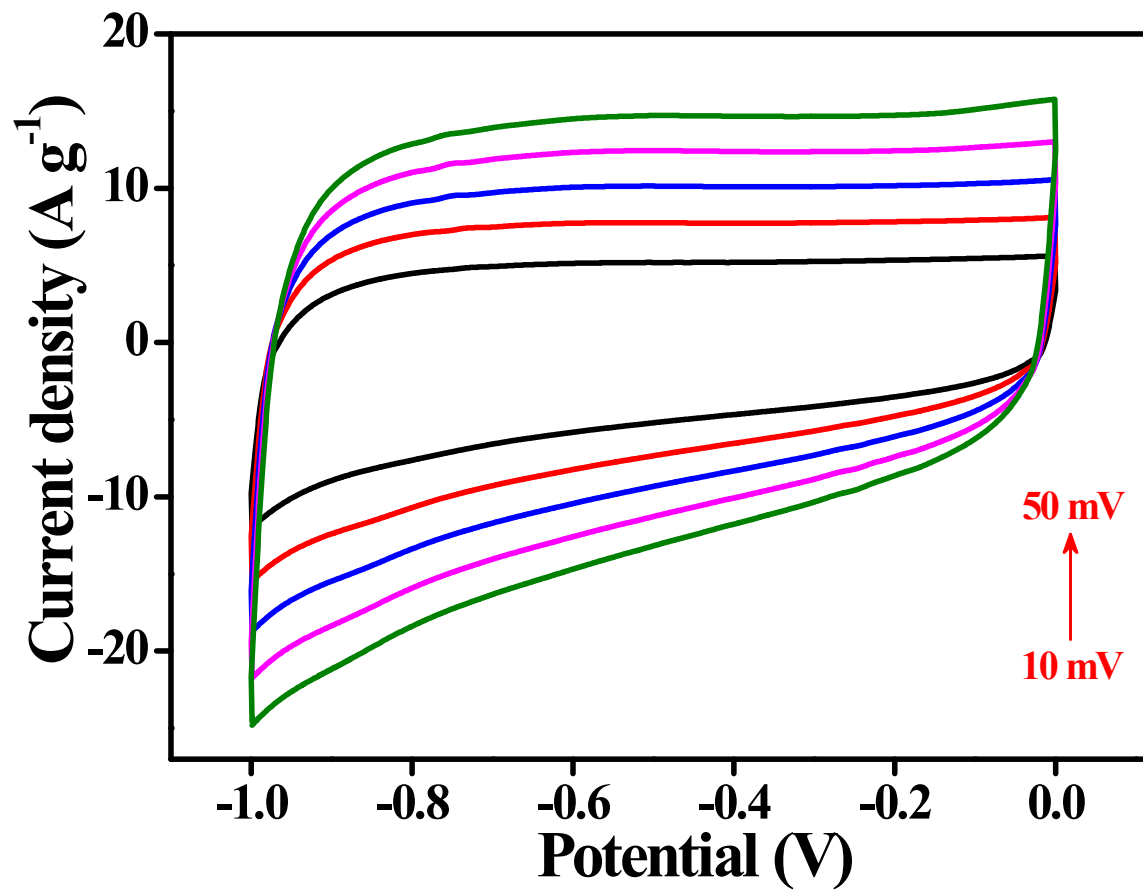

Fig. S19 CV curves of NG at different sweep rates (10-50 mV s<sup>-1</sup>)

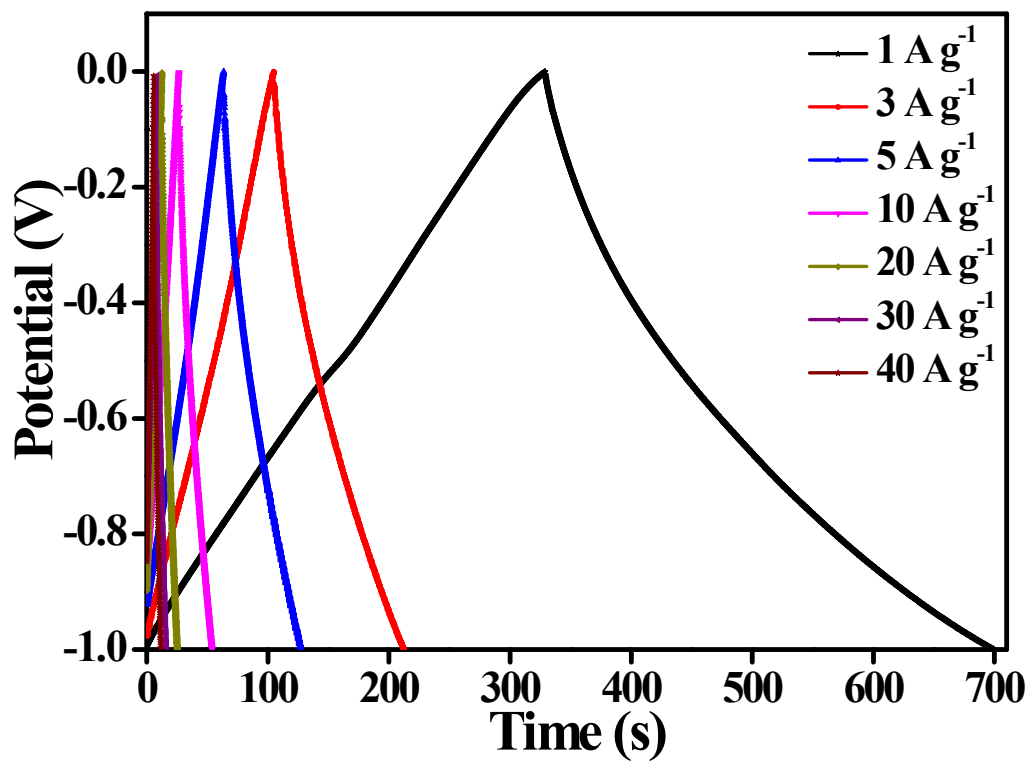

**Fig. S20** Galvanostatic charge-discharge curves of NG (negative electrode) at different current densities.

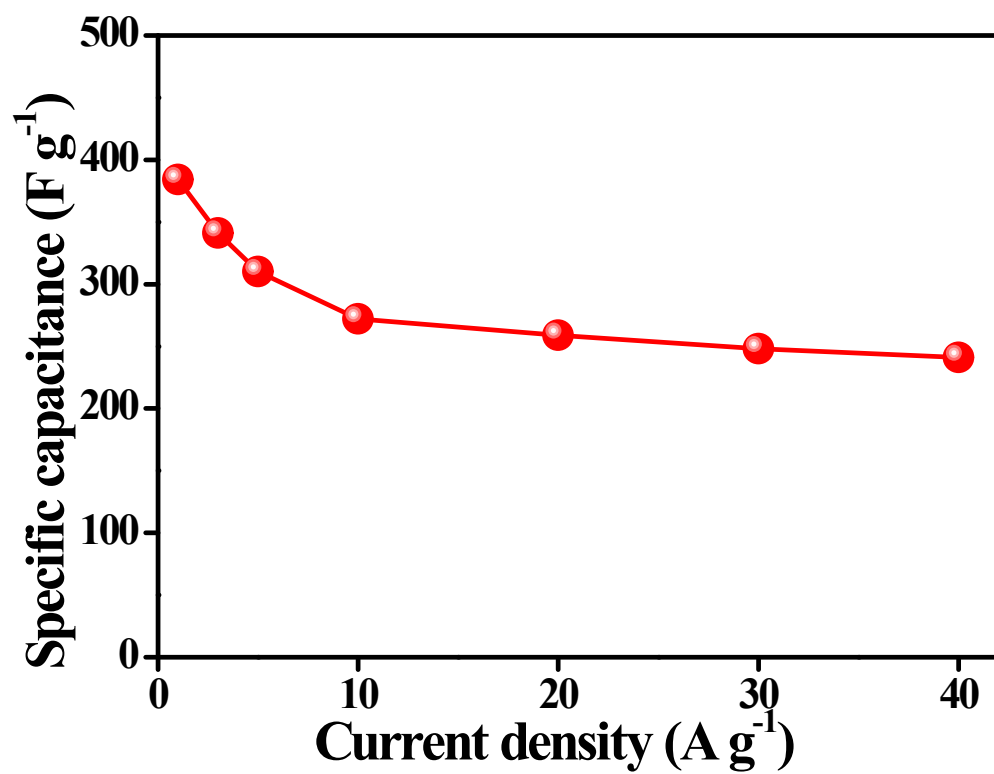

Fig. S21 specific capacitance vs the current density of NG (negative electrode).

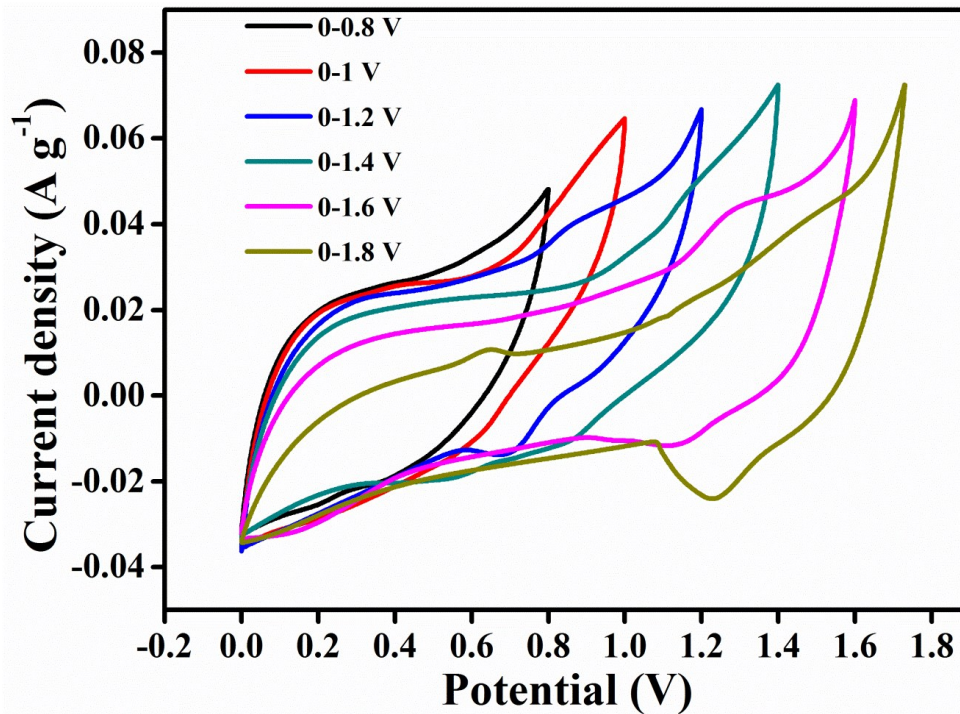

**Fig. S22** CV curves ( $50 \text{ mV s}^{-1}$ ) of  $\text{Co}_2\text{CuS}_4/\text{NG//NG}$  asymmetric supercapacitors at different potential windows.

**Table S1.** Chemical composition of NG, Co<sub>2</sub>CuS<sub>4</sub>/NG, CoS/NG and Cu<sub>2</sub>S/NG measured from XPS analysis.

| Sample                               | C (at. %) | N (at. %) | O (at. %) | S (at. %) | Co (at. %) | Cu (at. %) |
|--------------------------------------|-----------|-----------|-----------|-----------|------------|------------|
| NG                                   | 85.22     | 7.63      | 7.16      | -         | -          | -          |
| Co <sub>2</sub> CuS <sub>4</sub> /NG | 69.9      | 9.39      | 10.13     | 5.06      | 1.27       | 4.25       |
| CoS/NG                               | 74.36     | 7.83      | 13.22     | 2.17      | 2.43       | -          |
| Cu <sub>2</sub> S/NG                 | 78.72     | 6.56      | 9.09      | 1.63      | -          | 3.99       |



**Table S2.** Comparison of the electrochemical performance of the reported materials for supercapacitors.

| Materials                                                        | Specific capacitance (F g <sup>-1</sup> ) | Current density       | Electrolyte                     | Voltage window (V) | Stability           | References |
|------------------------------------------------------------------|-------------------------------------------|-----------------------|---------------------------------|--------------------|---------------------|------------|
| NiS                                                              | 845                                       | 1 A g <sup>-1</sup>   | 6 M KOH                         | 0-0.55             | -                   | 1          |
| MCs@GNS@NiS                                                      | 775                                       | 0.5 A g <sup>-1</sup> | 6 M KOH                         | 0-0.4              | 88.1% (1000 cycles) | 2          |
| TNT/cobalt sulfide                                               | 400                                       | 5 mA cm <sup>-2</sup> | Na <sub>2</sub> SO <sub>3</sub> | -1-0               | 80% (1000 cycles)   | 3          |
| NiCo <sub>2</sub> S <sub>4</sub> -carbon fiber                   | 1154                                      | 1 A g <sup>-1</sup>   | 2 M KOH                         | -0.1-0.5           | 92.8% (8000 cycles) | 4          |
| Bi <sub>2</sub> S <sub>3</sub> -rGO                              | 396                                       | 1 A g <sup>-1</sup>   | 2 M KOH                         | -0.2-0.45          | 75%                 | 5          |
| CNF@NiCo <sub>2</sub> O <sub>4</sub>                             | 906                                       | 2 A g <sup>-1</sup>   | 2 M KOH                         | 0-0.55             | 96.4% (2400 cycles) | 6          |
| NiCo <sub>2</sub> S <sub>4</sub> nanotube                        | 933                                       | 1 A g <sup>-1</sup>   | 6 M KOH                         | -0.1-0.5           | 99% (1000 cycles)   | 7          |
| Ni <sub>x</sub> Co <sub>1-x</sub> S <sub>1.097</sub> microsphere | 1152                                      | 0.5 A g <sup>-1</sup> | 2 M KOH                         | 0-0.5              | -                   | 8          |
| CoS <sub>2</sub> ellipsoid                                       | 1040                                      | 0.5 A g <sup>-1</sup> | 2 M KOH                         | -0.1-0.4           | 66% (1000 cycles)   | 9          |
| PPy/MoS <sub>2</sub>                                             | 553.7                                     | 1 A g <sup>-1</sup>   | 1 M KCl                         | -0.5-0.3           | 90% (500 cycles)    | 10         |
| Co <sub>2</sub> CuS <sub>4</sub> /NG                             | 1005                                      | 1 A g <sup>-1</sup>   | 6 M KOH                         | -0.1-0.5           | 96.3% (5000 cycles) | This work  |

MCs@GNS@NiS - graphene nanosheets/nickel sulfide based on make-up cottons; TNT – titania nanotube

## Notes and References

- 1 L. Peng, X. Wan, Y. Ruan, K. Xu, C. Chen, L. Miao, J. Jiang, *Electrochim. Acta*, 2015, **182**, 361-367.
- 2 Y. Li, K. Ye, K. Cheng, J. Yin, D. Cao, G. Wang, *J. Power Sources*, 2015, **274**, 943-950.
- 3 R. S. Ray, B. Sarma, A. L. Jurovitzki, M. Misra, *Chem. Eng. J.*, 2015, **260**, 671-683.
- 4 X. Xiong, G. Waller, D. Ding, D. Chen, B. Rainwater, B. Zhao, Z. Wang, M. Liu, *Nano Energy*, 2015, **15**, 71-80.
- 5 G. N. Nie, X. Lu, J. Lei, L. Yang and C. Wang, *Electrochim. Acta*, 2015, **154**, 24-30.
- 6 G. Zhang, X. W. Lou, *Sci. Rep.*, 2013, **3**, 1470.
- 7 H. Wan, J. Jiang, J. Yu, K. Xu, L. Zhang, H. Chen and Y. Ruan, *CrystEngComm*, 2013, **15**, 7649-7651.
- 8 Y. Gao, L. Mi, W. Wei, S. Cui, Z. Zheng, H. Hou and W. Chen, *ACS Appl. Mater. Interfaces*, 2015, **7**, 4311-4319.
- 9 L. Zhang, H. B. Wu and X. W. Lou, *Chem. Commun.*, 2012, **48**, 6912-6914.
- 10 Guo Ma, H. Peng, J. Mu, H. Huang, X. Zhou and Z. Lei, *J. Power Sources*, 2012, **229**, 72-78.
